# Supplementary material for: Structure Based Affinity Maturation and Characterizing of SARS-CoV Antibody CR3022 against SARS-CoV-2 by Computational and Experimental Approaches
Source: MDPI journal article supplement (doi:10.3390/v14020186), 2022-01-19

**Figure S1.** The binding kinetics and rate constants of SARS-CoV-RBD to single-site mutated antibodies measured by surface plasmon resonance (SPR).

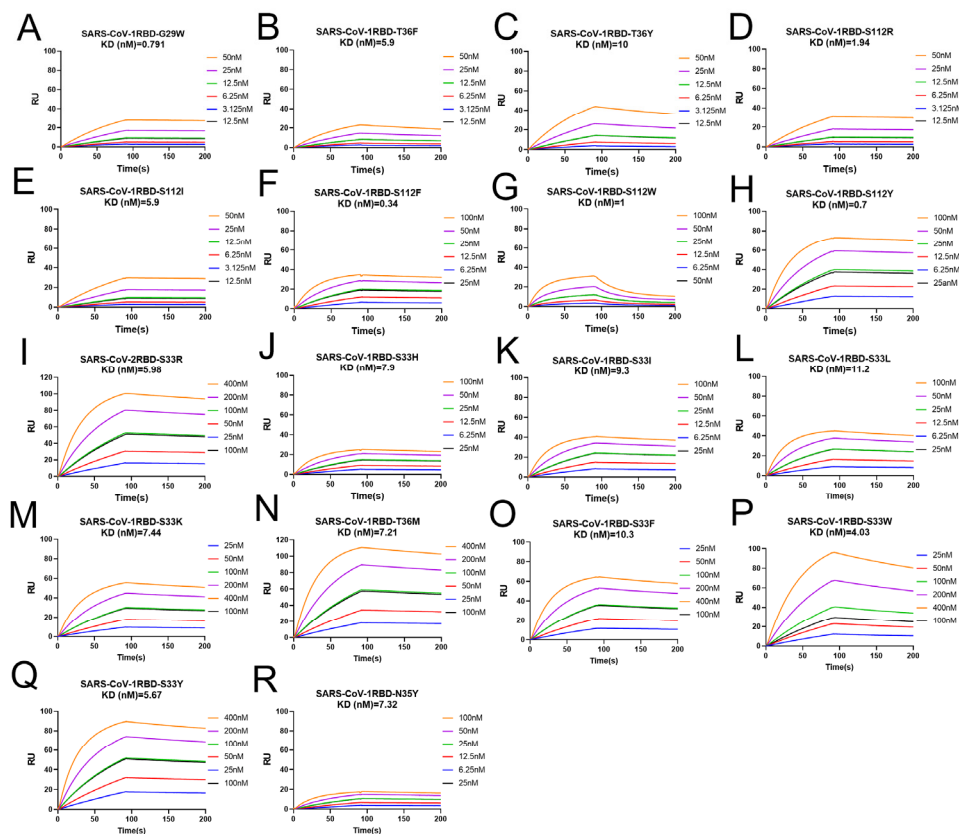

**Figure S2.** The binding kinetics and rate constants of SARS-CoV-2-RBD to single-site mutated antibodies measured by surface plasmon resonance (SPR).

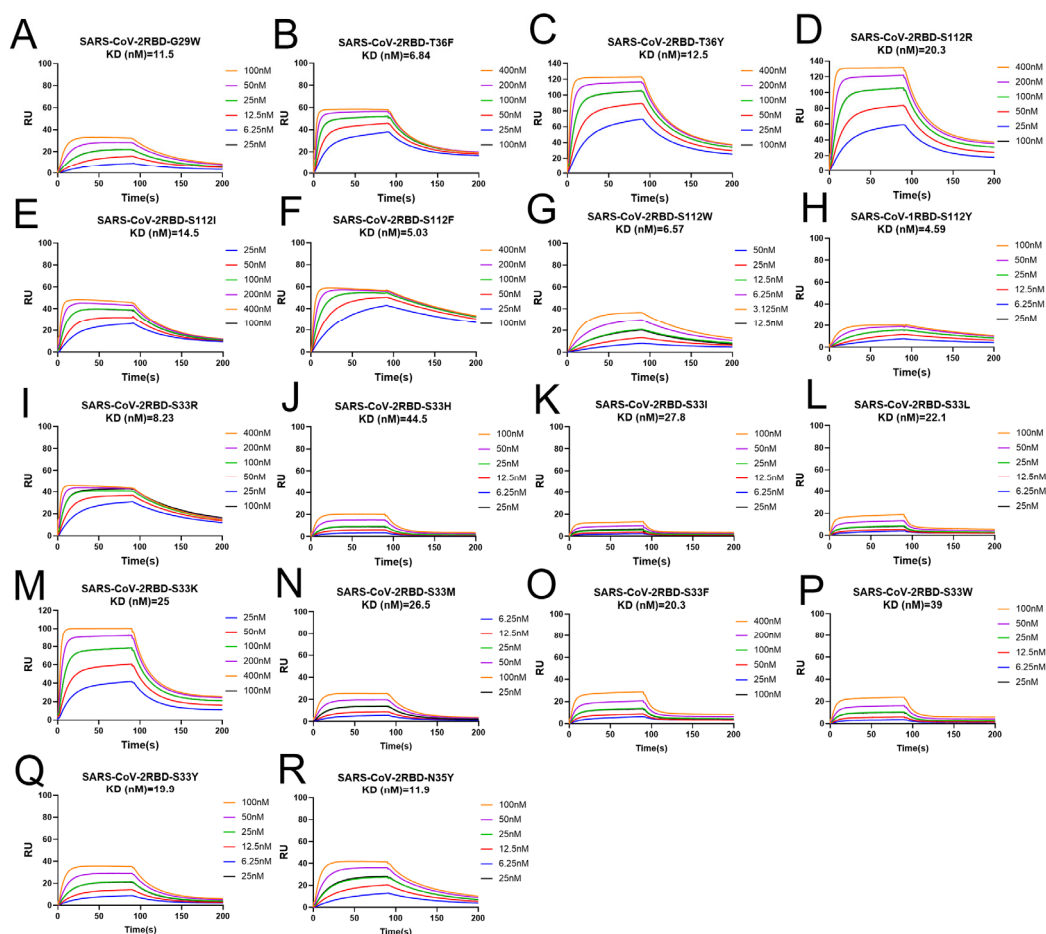

Supplement: s1 [file s1]
